# Supplementary material for: Titania supported MOF-199 derived Cu–Cu2O nanoparticles: highly efficient non-noble metal photocatalysts for hydrogen production from alcohol–water mixtures
Source: Royal Society of Chemistry journal article supplement (doi:10.1039/c6cy02328b), 2017-01-01
Supplement: c6cy02328b1.pdf [file c6cy02328b1.pdf]

## Titania supported MOF-199 derived Cu-Cu<sub>2</sub>O nanoparticles: Highly efficient non noble metal photocatalysts for hydrogen production from alcohol-water mixtures

Received 00th January 20xx,  
Accepted 00th January 20xx

DOI: 10.1039/x0xx00000x

www.rsc.org/

Imran Majeed,<sup>1</sup> Muhammad Amtiaz Nadeem,<sup>2\*\*</sup> Amin Badshah,<sup>1</sup> Fehmida Kanodarwala,<sup>3</sup> Hassan Ali,<sup>1</sup> M. Abdullah Khan,<sup>4</sup> John Arron Stride,<sup>3</sup> and Muhammad Arif Nadeem<sup>1\*</sup>

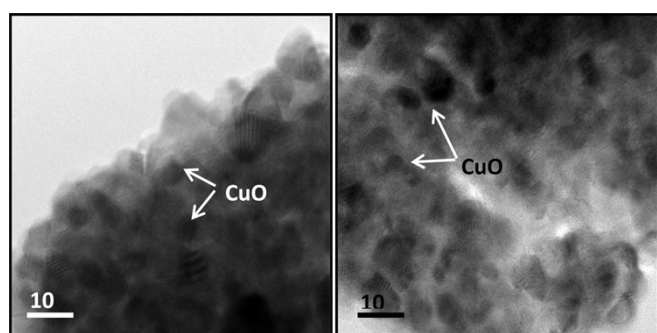

Figure S1: TEM images of TiO<sub>2</sub>-MOF-500 °C

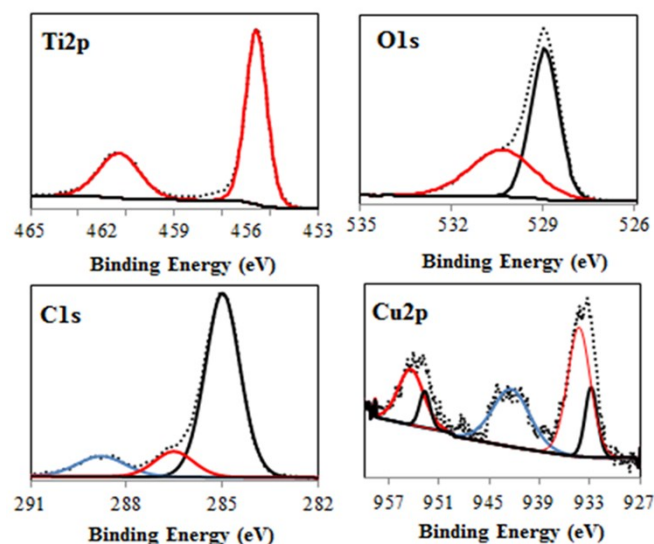

Figure S2. XPS core level spectra of Ti 2p, O 1s, C 1s and Cu 2p for TiO<sub>2</sub>-MOF-500 °C

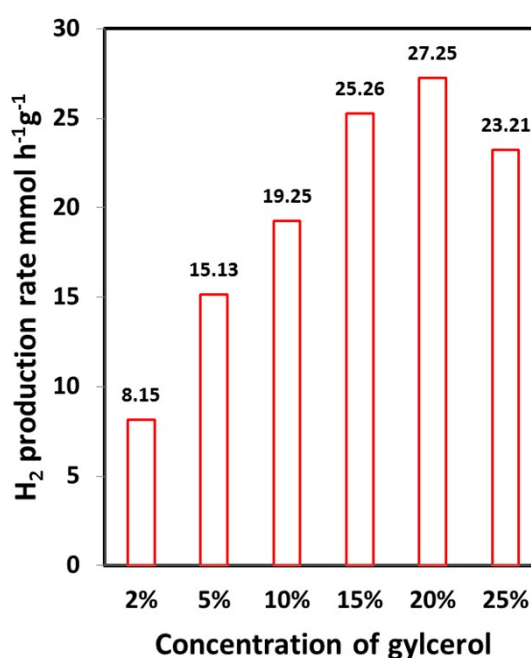

Figure S3: H<sub>2</sub> production rates over TiO<sub>2</sub>-MOF-400 °C from different concentrations of glycerol

\*Catalysis and Nanomaterials Lab 27, Department of Chemistry, Quaid-i-Azam University, Islamabad 45320, Pakistan. manadeem@qau.edu.pk, +92-51-9064-2062

<sup>b</sup>Department of Environmental Sciences, Quaid-i-Azam University, Islamabad 45320, Pakistan. manadeempk@gmail.com, NadeemMI@SABIC.com

<sup>c</sup>School of Chemistry, University of New South Wales, Sydney, NSW 2052, Australia.

<sup>d</sup>US. Pakistan Center for Advanced Studies in Energy, NUST, Islamabad, 44000, Pakistan  
† Present Address: SABIC-CRD at KAUST.

Electronic Supplementary Information (ESI) available: [details of any supplementary information available should be included here]. See DOI: 10.1039/x0xx00000x
